# Supplementary material for: Imine Palladacycles: Synthesis, Structural Analysis and Application in Suzuki–Miyaura Cross Coupling in Semi-Aqueous Media
Source: MDPI journal article supplement (doi:10.3390/molecules27103146), 2022-05-14

# Imine palladacycles: synthesis, structural analysis and applications to the Suzuki-Miyaura cross coupling in semi-aqueous media

Brais Bermúdez-Puente, Luis A. Adrio, Fátima Lucio-Martínez, Francisco Reigosa, Juan M. Ortiueira and José M. Vila\*

Department of Inorganic Chemistry, University of Santiago de Compostela, E-15782, Santiago de Compostela (Spain).

Imine palladacycles are useful as catalysts in the Suzuki-Miyaura cross coupling reaction in aqueous and semi-aqueous media.

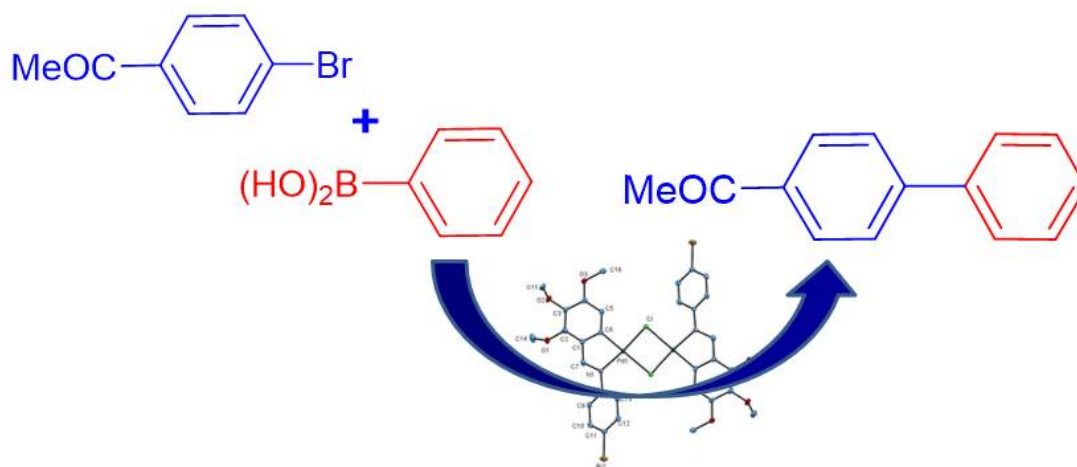

Supplement: s1 [file s1]
