# Supplementary material for: Imine Palladacycles: Synthesis, Structural Analysis and Application in Suzuki–Miyaura Cross Coupling in Semi-Aqueous Media
Source: MDPI journal article supplement (doi:10.3390/molecules27103146), 2022-05-14
Supplement: s1 [file s1]

**1c**Table S1. Crystal data and structure refinement for **1c**.

|                                             |                                                                                                            |
|---------------------------------------------|------------------------------------------------------------------------------------------------------------|
| Identification code                         | <b>1c</b>                                                                                                  |
| Empirical formula                           | C <sub>36</sub> H <sub>34</sub> Br <sub>2</sub> N <sub>2</sub> O <sub>10</sub> Pd <sub>2</sub> [+ solvent] |
| Formula weight                              | 1025.341                                                                                                   |
| Temperature/K                               | 99.99                                                                                                      |
| Crystal system                              | triclinic                                                                                                  |
| Space group                                 | P-1                                                                                                        |
| a/Å                                         | 11.688(5)                                                                                                  |
| b/Å                                         | 13.069(5)                                                                                                  |
| c/Å                                         | 13.658(5)                                                                                                  |
| $\alpha$ /°                                 | 97.379(5)                                                                                                  |
| $\beta$ /°                                  | 97.048(5)                                                                                                  |
| $\gamma$ /°                                 | 107.028(5)                                                                                                 |
| Volume/Å <sup>3</sup>                       | 1949.8(13)                                                                                                 |
| Z                                           | 2                                                                                                          |
| $\rho_{\text{calc}}$ /cm <sup>3</sup>       | 1.746                                                                                                      |
| $\mu$ /mm <sup>-1</sup>                     | 3.026                                                                                                      |
| F(000)                                      | 1007.8                                                                                                     |
| Crystal size/mm <sup>3</sup>                | 0.4 × 0.23 × 0.16                                                                                          |
| Radiation                                   | Mo K $\alpha$ ( $\lambda$ = 0.71073)                                                                       |
| 2 $\Theta$ range for data collection/°      | 3.06 to 52.8                                                                                               |
| Index ranges                                | -14 ≤ h ≤ 14, -14 ≤ k ≤ 16, -17 ≤ l ≤ 16                                                                   |
| Reflections collected                       | 28912                                                                                                      |
| Independent reflections                     | 7955 [R <sub>int</sub> = 0.0381, R <sub>sigma</sub> = 0.0481]                                              |
| Data/restraints/parameters                  | 7955/0/477                                                                                                 |
| Goodness-of-fit on F <sup>2</sup>           | 1.020                                                                                                      |
| Final R indexes [I ≥ 2 $\sigma$ (I)]        | R <sub>1</sub> = 0.0314, wR <sub>2</sub> = 0.0579                                                          |
| Final R indexes [all data]                  | R <sub>1</sub> = 0.0458, wR <sub>2</sub> = 0.0622                                                          |
| Largest diff. peak/hole / e Å <sup>-3</sup> | 1.09/-0.78                                                                                                 |

Table S2. Bond Lengths for **1c**.

| Atom | Atom | Length/Å    | Atom | Atom | Length/Å  |
|------|------|-------------|------|------|-----------|
| Pd1  | Pd2  | 2.9114 (10) | N2   | C24  | 1.430 (4) |
| Pd1  | O7   | 2.140 (2)   | C1   | C2   | 1.419 (4) |
| Pd1  | O9   | 2.045 (2)   | C1   | C6   | 1.403 (4) |
| Pd1  | N1   | 2.027 (3)   | C1   | C7   | 1.421 (4) |
| Pd1  | C6   | 1.962 (3)   | C2   | C3   | 1.382 (4) |
| Pd2  | O8   | 2.041 (2)   | C4   | C3   | 1.410 (4) |
| Pd2  | O10  | 2.141 (2)   | C4   | C5   | 1.391 (4) |
| Pd2  | N2   | 2.045 (3)   | C6   | C5   | 1.378 (4) |

| Atom | Atom | Length/Å  | Atom | Atom | Length/Å  |
|------|------|-----------|------|------|-----------|
| Pd2  | C22  | 1.962 (3) | C8   | C13  | 1.379 (4) |
| Br1  | C11  | 1.905 (3) | C9   | C8   | 1.395 (4) |
| Br2  | C27  | 1.903 (3) | C10  | C9   | 1.383 (4) |
| O1   | C2   | 1.366 (4) | C11  | C10  | 1.381 (4) |
| O1   | C14  | 1.441 (4) | C11  | C12  | 1.379 (4) |
| O2   | C3   | 1.383 (4) | C12  | C13  | 1.395 (4) |
| O2   | C15  | 1.432 (4) | C17  | C18  | 1.406 (4) |
| O3   | C4   | 1.354 (4) | C17  | C22  | 1.401 (4) |
| O3   | C16  | 1.423 (4) | C19  | C18  | 1.383 (4) |
| O4   | C18  | 1.380 (4) | C19  | C20  | 1.407 (5) |
| O4   | C30  | 1.436 (4) | C21  | C20  | 1.383 (5) |
| O5   | C19  | 1.379 (4) | C22  | C21  | 1.387 (4) |
| O5   | C31  | 1.431 (4) | C23  | C17  | 1.423 (4) |
| O6   | C20  | 1.369 (4) | C25  | C24  | 1.384 (4) |
| O6   | C32  | 1.429 (4) | C25  | C26  | 1.387 (4) |
| O7   | C33  | 1.248 (4) | C27  | C26  | 1.391 (5) |
| O8   | C33  | 1.272 (4) | C28  | C27  | 1.376 (5) |
| O9   | C35  | 1.275 (4) | C28  | C29  | 1.390 (4) |
| O10  | C35  | 1.243 (4) | C29  | C24  | 1.391 (4) |
| N1   | C7   | 1.303 (4) | C33  | C34  | 1.508 (4) |
| N1   | C8   | 1.429 (4) | C35  | C36  | 1.505 (5) |
| N2   | C23  | 1.298 (4) |      |      |           |

Table S3. Bond Angles for **1c**.

| Atom | Atom | Atom | Angle/°     | Atom | Atom | Atom | Angle/°   |
|------|------|------|-------------|------|------|------|-----------|
| O7   | Pd1  | Pd2  | 76.35 (5)   | C6   | C5   | C4   | 119.8 (3) |
| O7   | Pd1  | O9   | 89.04 (8)   | C1   | C6   | Pd1  | 113.1 (2) |
| O9   | Pd1  | Pd2  | 86.95 (6)   | C5   | C6   | Pd1  | 127.3 (2) |
| N1   | Pd1  | Pd2  | 95.12 (7)   | C5   | C6   | C1   | 119.6 (3) |
| N1   | Pd1  | O7   | 98.09 (9)   | C1   | C7   | N1   | 116.8 (3) |
| N1   | Pd1  | O9   | 172.86 (9)  | C9   | C8   | N1   | 118.1 (3) |
| C6   | Pd1  | Pd2  | 105.64 (8)  | C13  | C8   | N1   | 121.8 (3) |
| C6   | Pd1  | O7   | 177.91 (10) | C13  | C8   | C9   | 120.1 (3) |
| C6   | Pd1  | O9   | 91.70 (11)  | C8   | C9   | C10  | 120.0 (3) |
| C6   | Pd1  | N1   | 81.16 (12)  | C9   | C10  | C11  | 118.8 (3) |
| O8   | Pd2  | Pd1  | 85.57 (6)   | C10  | C11  | Br1  | 118.9 (2) |
| O10  | Pd2  | Pd1  | 74.95 (6)   | C12  | C11  | Br1  | 119.0 (2) |
| O10  | Pd2  | O8   | 89.43 (9)   | C12  | C11  | C10  | 122.1 (3) |
| O10  | Pd2  | N2   | 98.08 (9)   | C13  | C12  | C11  | 118.5 (3) |
| N2   | Pd2  | Pd1  | 98.38 (7)   | C8   | C13  | C12  | 120.2 (3) |
| N2   | Pd2  | O8   | 172.19 (10) | C18  | C17  | C23  | 124.3 (3) |
| C22  | Pd2  | Pd1  | 109.62 (9)  | C22  | C17  | C18  | 120.6 (3) |

| Atom | Atom | Atom | Angle/°     | Atom | Atom | Atom | Angle/°   |
|------|------|------|-------------|------|------|------|-----------|
| C22  | Pd2  | O8   | 90.78 (11)  | C22  | C17  | C23  | 115.1 (3) |
| C22  | Pd2  | O10  | 175.43 (10) | C17  | C18  | O4   | 117.8 (3) |
| C22  | Pd2  | N2   | 81.56 (12)  | C17  | C18  | C19  | 119.6 (3) |
| C2   | O1   | C14  | 119.6 (2)   | C19  | C18  | O4   | 122.4 (3) |
| C15  | O2   | C3   | 112.6 (2)   | C18  | C19  | O5   | 120.7 (3) |
| C16  | O3   | C4   | 117.3 (2)   | C20  | C19  | O5   | 120.2 (3) |
| C18  | O4   | C30  | 116.1 (2)   | C20  | C19  | C18  | 119.1 (3) |
| C31  | O5   | C19  | 113.0 (2)   | C19  | C20  | O6   | 114.1 (3) |
| C20  | O6   | C32  | 117.4 (3)   | C21  | C20  | O6   | 124.5 (3) |
| C33  | O7   | Pd1  | 129.59 (19) | C21  | C20  | C19  | 121.4 (3) |
| C33  | O8   | Pd2  | 122.1 (2)   | C20  | C21  | C22  | 119.7 (3) |
| C35  | O9   | Pd1  | 120.2 (2)   | C17  | C22  | Pd2  | 112.9 (2) |
| C35  | O10  | Pd2  | 131.6 (2)   | C21  | C22  | Pd2  | 127.5 (2) |
| C7   | N1   | Pd1  | 113.7 (2)   | C21  | C22  | C17  | 119.6 (3) |
| C8   | N1   | Pd1  | 126.5 (2)   | C17  | C23  | N2   | 117.5 (3) |
| C8   | N1   | C7   | 119.7 (3)   | C25  | C24  | N2   | 119.9 (3) |
| C23  | N2   | Pd2  | 112.9 (2)   | C29  | C24  | N2   | 119.7 (3) |
| C24  | N2   | Pd2  | 128.0 (2)   | C29  | C24  | C25  | 120.3 (3) |
| C24  | N2   | C23  | 118.9 (3)   | C24  | C25  | C26  | 119.9 (3) |
| C6   | C1   | C2   | 121.1 (3)   | C25  | C26  | C27  | 119.2 (3) |
| C7   | C1   | C2   | 124.3 (3)   | C26  | C27  | Br2  | 119.7 (3) |
| C7   | C1   | C6   | 114.6 (3)   | C26  | C27  | C28  | 121.4 (3) |
| C1   | C2   | O1   | 115.9 (3)   | C28  | C27  | Br2  | 119.0 (3) |
| C3   | C2   | O1   | 125.4 (3)   | C29  | C28  | C27  | 119.2 (3) |
| C3   | C2   | C1   | 118.6 (3)   | C24  | C29  | C28  | 120.0 (3) |
| C2   | C3   | O2   | 121.6 (3)   | O7   | C33  | O8   | 126.4 (3) |
| C2   | C3   | C4   | 119.7 (3)   | C34  | C33  | O7   | 118.6 (3) |
| C4   | C3   | O2   | 118.7 (3)   | C34  | C33  | O8   | 115.0 (3) |
| C3   | C4   | O3   | 114.0 (3)   | O10  | C35  | O9   | 126.3 (3) |
| C3   | C4   | C5   | 121.2 (3)   | C36  | C35  | O9   | 115.8 (3) |
| C5   | C4   | O3   | 124.9 (3)   | C36  | C35  | O10  | 117.9 (3) |

## 2cCl

Table S4. Crystal data and structure refinement for 2cCl

|                     |                                                                                                                |
|---------------------|----------------------------------------------------------------------------------------------------------------|
| Identification code | <b>2cCl</b>                                                                                                    |
| Empirical formula   | C <sub>64</sub> H <sub>60</sub> Br <sub>4</sub> Cl <sub>4</sub> N <sub>4</sub> O <sub>12</sub> Pd <sub>4</sub> |
| Formula weight      | 1964.295                                                                                                       |
| Temperature/K       | 99.99                                                                                                          |
| Crystal system      | monoclinic                                                                                                     |
| Space group         | P2 <sub>1</sub> /c                                                                                             |
| a/Å                 | 13.9156(3)                                                                                                     |

|                                                |                                                                |
|------------------------------------------------|----------------------------------------------------------------|
| b/Å                                            | 3.92009(8)                                                     |
| c/Å                                            | 30.0833(6)                                                     |
| $\alpha/^\circ$                                | 90                                                             |
| $\beta/^\circ$                                 | 102.0378(10)                                                   |
| $\gamma/^\circ$                                | 90                                                             |
| Volume/Å <sup>3</sup>                          | 1604.97(6)                                                     |
| Z                                              | 1                                                              |
| $\rho_{\text{calc}}/\text{g}/\text{cm}^3$      | 2.032                                                          |
| $\mu/\text{mm}^{-1}$                           | 3.825                                                          |
| F(000)                                         | 956.3                                                          |
| Crystal size/mm <sup>3</sup>                   | 0.1 × 0.06 × 0.04                                              |
| Radiation                                      | Mo K $\alpha$ ( $\lambda$ = 0.71073)                           |
| 2 $\Theta$ range for data collection/ $^\circ$ | 3 to 53.22                                                     |
| Index ranges                                   | -17 ≤ h ≤ 17, -4 ≤ k ≤ 4, -37 ≤ l ≤ 37                         |
| Reflections collected                          | 21117                                                          |
| Independent reflections                        | 3313 [ $R_{\text{int}}$ = 0.0501, $R_{\text{sigma}}$ = 0.0387] |
| Data/restraints/parameters                     | 3313/0/211                                                     |
| Goodness-of-fit on F <sup>2</sup>              | 1.036                                                          |
| Final R indexes [ $I \geq 2\sigma(I)$ ]        | $R_1$ = 0.0283, $wR_2$ = 0.0501                                |
| Final R indexes [all data]                     | $R_1$ = 0.0448, $wR_2$ = 0.0541                                |
| Largest diff. peak/hole / e Å <sup>-3</sup>    | 0.81/-0.88                                                     |

Table S5. Bond Lengths for 2cCl.

| Atom | Atom             | Length/Å   | Atom | Atom | Length/Å  |
|------|------------------|------------|------|------|-----------|
| Pd1  | Cl1 <sup>1</sup> | 2.4485 (8) | C2   | C1   | 1.404 (4) |
| Pd1  | Cl1              | 2.3338 (8) | C2   | C3   | 1.389 (4) |
| Pd1  | N1               | 2.048 (3)  | C3   | C4   | 1.402 (5) |
| Pd1  | C6               | 1.966 (3)  | C4   | C5   | 1.398 (4) |
| Br2  | C11              | 1.902 (3)  | C6   | C1   | 1.404 (4) |
| O1   | C2               | 1.376 (4)  | C6   | C5   | 1.375 (4) |
| O1   | C14              | 1.433 (4)  | C7   | C1   | 1.422 (4) |
| O2   | C3               | 1.383 (4)  | C8   | C13  | 1.392 (4) |
| O2   | C15              | 1.441 (4)  | C9   | C8   | 1.388 (4) |
| O3   | C4               | 1.365 (4)  | C9   | C10  | 1.383 (4) |
| O3   | C16              | 1.427 (4)  | C11  | C10  | 1.378 (4) |
| N1   | C7               | 1.304 (4)  | C12  | C11  | 1.389 (5) |
| N1   | C8               | 1.423 (4)  | C12  | C13  | 1.388 (4) |

Table S6. Bond Angles for 2cCl.

| Atom | Atom | Atom             | Angle/ $^\circ$ | Atom | Atom | Atom | Angle/ $^\circ$ |
|------|------|------------------|-----------------|------|------|------|-----------------|
| N1   | Pd1  | Cl1              | 173.79 (7)      | C4   | C3   | C2   | 119.0 (3)       |
| N1   | Pd1  | Cl1 <sup>1</sup> | 99.35 (7)       | C3   | C4   | O3   | 115.5 (3)       |

| Atom | Atom | Atom             | Angle/°    | Atom | Atom | Atom | Angle/°   |
|------|------|------------------|------------|------|------|------|-----------|
| C6   | Pd1  | C11              | 93.83 (9)  | C5   | C4   | O3   | 123.3 (3) |
| C6   | Pd1  | C11 <sup>1</sup> | 178.38 (9) | C5   | C4   | C3   | 121.2 (3) |
| C6   | Pd1  | N1               | 81.20 (11) | C4   | C5   | C6   | 119.9 (3) |
| C14  | O1   | C2               | 115.1 (3)  | C1   | C6   | Pd1  | 113.0 (2) |
| C15  | O2   | C3               | 114.5 (2)  | C5   | C6   | Pd1  | 127.6 (2) |
| C16  | O3   | C4               | 116.8 (2)  | C5   | C6   | C1   | 119.4 (3) |
| C7   | N1   | Pd1              | 113.2 (2)  | C1   | C7   | N1   | 117.0 (3) |
| C7   | N1   | C8               | 118.9 (3)  | C9   | C8   | N1   | 121.4 (3) |
| C8   | N1   | Pd1              | 127.9 (2)  | C13  | C8   | N1   | 118.7 (3) |
| C6   | C1   | C2               | 120.9 (3)  | C13  | C8   | C9   | 119.8 (3) |
| C7   | C1   | C2               | 123.8 (3)  | C10  | C9   | C8   | 120.3 (3) |
| C7   | C1   | C6               | 115.1 (3)  | C11  | C10  | C9   | 119.4 (3) |
| C1   | C2   | O1               | 118.3 (3)  | C10  | C11  | Br2  | 118.2 (3) |
| C1   | C2   | C3               | 119.6 (3)  | C10  | C11  | C12  | 121.3 (3) |
| C3   | C2   | O1               | 122.0 (3)  | C12  | C11  | Br2  | 120.4 (2) |
| C2   | C3   | O2               | 119.5 (3)  | C13  | C12  | C11  | 119.0 (3) |
| C4   | C3   | O2               | 121.3 (3)  | C12  | C13  | C8   | 120.1 (3) |
